# Supplementary material
Source: MDPI journal article supplement (https://www.mdpi.com/2410-3888/9/3/84)
Supplement: s1 [file s1]

## **Supplementary Material**

### **Distribution and Management of Residual Antibiotics in *Litopenaeus vannamei***

#### **Shrimp Farming Environment: Recommendations for Effective Control**

Feipeng Li<sup>1</sup>, Siyu Xie<sup>1</sup>, Mingzhu Wang<sup>2</sup>, Ling Chen<sup>2</sup>, Haixiang Yu<sup>1\*</sup>

<sup>1</sup> *School of Environment and Architecture, University of Shanghai for Science and Technology, Shanghai 200093, China;*

<sup>2</sup> *College of Environmental Science and Engineering, Tongji University, Shanghai 200092, China;*

\* *Authors to whom correspondence should be addressed.*

**Corresponding author:** Haixiang Yu ([Yhx\\_1201@usst.edu.cn](mailto:Yhx_1201@usst.edu.cn)).

Table S1. Temperature, salinity, and pH of water bodies in ponds 1-3.

| <b>Aquaculture<br/>Pond</b> | <b>Temperature<br/>(°C)</b> | <b>Salinity<br/>(‰)</b> | <b>pH</b> | <b>DO (mg/L)</b> |
|-----------------------------|-----------------------------|-------------------------|-----------|------------------|
| 1                           | 23.06±0.63                  | 1.58±0.01               | 7.4±0.03  | 13.96±2.58       |
| 2                           | 23.1±0.78                   | 1.59±0.01               | 8.05±0.05 | 10.19±3.31       |
| 3                           | 24.25±0.69                  | 1.46±0.02               | 8.16±0.02 | 10.09±0.53       |

Table S2. Feed feeding situation in shrimp farming.

| Breeding Stage                  | Feed      | Dosage | Number of Times |
|---------------------------------|-----------|--------|-----------------|
| Before breeding                 | /         | /      | /               |
| Post-larvae                     | Open feed | 0.003g | 5-7 times a day |
| Early stage of juvenile shrimp  | NO.0 feed | 0.01g  | 4-5 times a day |
| Middle stage of juvenile shrimp | NO.1 feed | 0.1g   | 3-4 times a day |
| Adult shrimp stage              | NO.1 feed | 1g     | 1-3 times a day |

Table S3. The reagents used in the experiment

| Reagent Name                                                                             | Purity/Specification                                        | Manufacturers              |
|------------------------------------------------------------------------------------------|-------------------------------------------------------------|----------------------------|
| Methanol                                                                                 | chromatographic<br>purity                                   | Anpel, CNW                 |
| Acetonitrile                                                                             | chromatographic<br>purity                                   | Anpel, CNW                 |
| Propanone                                                                                | chromatographic<br>purity                                   | Anpel, CNW                 |
| Hexyl hydride                                                                            | chromatographic<br>purity                                   | Anpel, CNW                 |
| Acetic Acid                                                                              | chromatographic<br>purity                                   | Anpel, CNW                 |
| Edetate disodium<br>( $\text{Na}_2\text{EDTA}$ )                                         | analytical purity                                           | Sinopharm chemical reagent |
| Citric acid monohydrate<br>( $\text{C}_6\text{H}_8\text{O}_7 \cdot \text{H}_2\text{O}$ ) | analytical purity                                           | Sinopharm chemical reagent |
| Dibasic Sodium Phosphate<br>( $\text{Na}_2\text{HPO}_4 \cdot 12\text{H}_2\text{O}$ )     | analytical purity                                           | Sinopharm chemical reagent |
| ultrapure water                                                                          | The resistivity was<br>$18.2\text{M}\Omega \cdot \text{cm}$ | Merck (Germany), Millipore |

Table S4. Mass spectrometry condition parameters for various target antibiotics

| <b>Chemical Compound</b> | <b>Parent Ion (m/z)</b> | <b>Daughter Ion (m/z)</b> | <b>Retention Period (min)</b> | <b>Cracking Voltage (V)</b> | <b>Collision Energies (eV)</b> |
|--------------------------|-------------------------|---------------------------|-------------------------------|-----------------------------|--------------------------------|
| SDZ                      | 250.9                   | 108.0, 155.9              | 4.98                          | 70                          | 25, 16                         |
| SMX                      | 253.9                   | 92.1, 108.0               | 5.33                          | 71                          | 27, 25                         |
| SMZ                      | 279.0                   | 124.1, 185.9              | 5.38                          | 67                          | 24, 17                         |
| SMD                      | 280.9                   | 92.1, 155.9               | 5.20                          | 76                          | 28, 17                         |
| TMP                      | 291.0                   | 230.0, 261.0              | 4.76                          | 86                          | 25, 23                         |
| <sup>13</sup> C-TMP      | 294.2                   | 231.1, 262.1              | 4.77                          | 112                         | 25, 23                         |
| NOF                      | 320.2                   | 276.2, 302.2              | 4.85                          | 116                         | 15, 20                         |
| LEOF                     | 362.2                   | 261.2, 317.9              | 4.59                          | 114                         | 27, 18                         |
| TC                       | 445.2                   | 154.0, 410.3              | 5.07                          | 118                         | 26, 19                         |
| OTC                      | 461.2                   | 426.5, 443.9              | 5.19                          | 135                         | 18, 15                         |
| CTC                      | 479.1                   | 444.1, 462.0              | 5.40                          | 120                         | 20, 17                         |
| ETM                      | 716.4                   | 158.2, 558.7              | 5.76                          | 87                          | 28, 16                         |
| RTM                      | 837.8                   | 158.0, 680.0              | 5.54                          | 82                          | 30, 20                         |

Table S5. The content levels of various antibiotics in feed, pond water, sediment, and shrimp body during a farming cycle.

| Antibiotic  | Aquaculture          | Feed                 | Water             | Sediment             | Shrimp               |
|-------------|----------------------|----------------------|-------------------|----------------------|----------------------|
| Name        | Available/Prohibited | ( $\mu\text{g/kg}$ ) | ( $\text{ng/L}$ ) | ( $\mu\text{g/kg}$ ) | ( $\mu\text{g/kg}$ ) |
| SDZ         | available            | n.d.-2.40            | n.d. -2.29        | n.d. -1.77           | n.d.                 |
| SMX         | available            | 5.32-13.96           | 2.17-7.87         | 0.95 -5.88           | 1.09-8.95            |
| SMZ         | available            | n.d.                 | n.d.              | n.d.                 | n.d.                 |
| SMD         | available            | n.d.                 | n.d.              | n.d.                 | n.d.                 |
| TMP         | available            | n.d.-1.10            | n.d.              | n.d.                 | n.d.                 |
| TC          | available            | n.d.-9.90            | n.d.-6.31         | n.d. -4.33           | n.d.-8.13            |
| OTC         | available            | 16.95-30.73          | 16.59 -54.37      | 2.72 -10.52          | 5.91-26.80           |
| CTC         | available            | 5.69-15.71           | n.d.-3.61         | n.d. -3.22           | n.d.-16.08           |
| <b>NOF</b>  | prohibited           | <b>n.d.-25.57</b>    | <b>n.d.</b>       | <b>2.41-8.09</b>     | <b>3.50-16.16</b>    |
| <b>LEOF</b> | prohibited           | <b>5.45-46.45</b>    | <b>n.d.-11.74</b> | <b>n.d.-21.72</b>    | <b>21.67-78.02</b>   |
| <b>ETM</b>  | prohibited           | <b>n.d.</b>          | <b>n.d.</b>       | <b>n.d.</b>          | <b>n.d.</b>          |
| RTM         | NA                   | n.d.-2.92            | n.d.              | n.d.-2.10            | n.d.                 |

Note: n.d.: indicates not detected; NA: indicates no relevant standards; Bold text: indicates prohibited antibiotics in aquatic products and their data.

Table S6. Correlation analysis between the content of TCs antibiotics in feed and residual concentrations in water.

| <b>Correlation</b> | <b>Water</b> | <b>Feed</b> |
|--------------------|--------------|-------------|
| water              | 1            | 0.884*      |
| feed               | 0.884*       | 1           |
